# Supplementary material
Source: PubMed Central journal article supplement (PMC3365207)
Supplement: 1200219109_pnas.201200219SI.pdf [file 1200219109_pnas.201200219SI.pdf]

# Supporting Information

Collet et al. 10.1073/pnas.1200219109

**Table S1.** Information broken down for replicate groups on *T*, *M*, *N*, and *P*, their SD and coefficient of variation, sexual selection gradients of *M*, *P*, and *T* ( $\beta_M$ ,  $\beta_P$ , and  $\beta_T$ , respectively), sexual selection gradients of male social status on *M*, *P*, and *T* ( $\beta_{SM}$ ,  $\beta_{SP}$ , and  $\beta_{ST}$ , respectively), and postcopulatory sexual selection gradient of remating rates with the same female ( $\beta_{remating/P}$ )

| Variable                                    | Group 1 | Group 2 | Group 3 | Group 4 | Group 5 | Group 6 | Group 7 | Group 8 | Group 9 | Group 10 | Group 11 | Group 12 | Group 13 | Average |
|---------------------------------------------|---------|---------|---------|---------|---------|---------|---------|---------|---------|----------|----------|----------|----------|---------|
| <i>T</i>                                    | 9.33    | 9.00    | 7.33    | 7.00    | 4.67    | 4.00    | 9.00    | 4.33    | 7.00    | 9.33     | 7.00     | 2.00     | 4.67     | 6.51    |
| <i>M</i>                                    | 3.67    | 3.00    | 2.67    | 4.00    | 3.33    | 3.00    | 3.33    | 2.00    | 2.00    | 2.33     | 3.67     | 1.33     | 2.33     | 2.82    |
| <i>N</i>                                    | 6.89    | 6.75    | 6.44    | 5.25    | 4.17    | 3.33    | 7.00    | 4.88    | 6.13    | 6.83     | 5.17     | 1.50     | 4.22     | 5.27    |
| <i>P</i>                                    | 0.36    | 0.38    | 0.35    | 0.33    | 0.34    | 0.39    | 0.36    | 0.50    | 0.55    | 0.54     | 0.35     | 1.00     | 0.35     | 0.45    |
| <i>T</i> ( <i>M</i> * <i>N</i> * <i>P</i> ) | 9.02    | 7.73    | 6.00    | 7.00    | 4.76    | 3.89    | 8.47    | 4.88    | 6.71    | 8.54     | 6.68     | 2.00     | 3.46     | 6.09    |
| $I_T$                                       | 0.30    | 0.70    | 2.24    | 0.39    | 0.02    | 0.56    | 0.64    | 1.08    | 1.61    | 1.68     | 0.57     | 3.00     | 2.40     | 1.17    |
| $I_M$                                       | 0.02    | 0.11    | 0.05    | 0.00    | 0.03    | 0.33    | 0.12    | 1.00    | 1.00    | 0.80     | 0.02     | 3.00     | 0.06     | 0.50    |
| $I_N$                                       | 0.00    | 0.00    | 0.04    | 0.00    | 0.02    | 0.03    | 0.00    | 0.22    | 0.04    | 0.00     | 0.00     | —        | 0.01     | 0.03    |
| $I_P$                                       | 0.19    | 0.50    | 1.93    | 0.39    | 0.02    | 0.20    | 0.41    | 0.30    | 0.46    | 0.57     | 0.43     | —        | 2.06     | 0.62    |
| $I_M^*$                                     | 0.68    | 0.74    | 0.70    | 0.67    | 0.69    | 0.89    | 0.75    | 1.33    | 1.33    | 1.20     | 0.68     | 2.67     | 0.71     | 1.00    |
| $I_N^*$                                     | 0.67    | 0.68    | 0.67    | 0.67    | 0.65    | 0.55    | 0.64    | 0.56    | 0.59    | 0.67     | 0.67     | 0.67     | 0.70     | 0.65    |
| $I_P^*$                                     | 0.86    | 1.28    | 2.58    | 0.93    | 0.66    | 0.92    | 1.09    | 0.69    | 1.02    | 1.13     | 1.06     | 0.67     | 3.01     | 1.22    |
| $SD_T$                                      | 5.13    | 7.55    | 10.97   | 4.36    | 0.58    | 3.00    | 7.21    | 4.51    | 8.89    | 12.10    | 5.29     | 3.46     | 7.23     | 6.18    |
| $SD_M$                                      | 0.58    | 1.00    | 0.58    | 0.00    | 0.58    | 1.73    | 1.15    | 2.00    | 2.00    | 2.08     | 0.58     | 2.31     | 0.58     | 1.17    |
| $SD_N$                                      | 0.19    | 0.25    | 1.26    | 0.00    | 0.60    | 0.58    | 0.43    | 2.30    | 1.24    | 0.24     | 0.14     | —        | 0.38     | 0.63    |
| $SD_P$                                      | 0.16    | 0.27    | 0.49    | 0.21    | 0.05    | 0.17    | 0.23    | 0.27    | 0.37    | 0.40     | 0.23     | —        | 0.50     | 0.28    |
| $\beta_M$                                   | 0.12    | 0.53    | 0.01    | —       | 0.03    | 0.29    | 0.15    | 1.15    | 1.86    | 4.02     | 0.10     | 1.73     | 0.23     | 0.85    |
| $\beta_M^\dagger$                           | 0.40    | 0.83    | 0.75    | —       | 0.06    | 0.65    | 0.58    | 1.04    | 1.21    | 1.07     | 0.49     | 1.73     | 1.55     | 0.86    |
| $\beta_P$                                   | 0.47    | 0.32    | 1.49    | 0.62    | 0.11    | 0.52    | 0.70    | —       | —       | —        | 0.70     | —        | 1.32     | 0.69    |
| $\beta_P^\dagger$                           | 0.54    | 0.82    | 1.50    | 0.62    | 0.12    | 0.72    | 0.79    | 0.82    | 1.31    | 1.36     | 0.75     | —        | 1.55     | 0.91    |
| $\beta_{SM}$                                | 0.14    | 0.33    | 0.00    | 0.00    | 0.15    | 0.50    | 0.30    | 0.50    | 0.50    | 0.86     | 0.14     | 1.50     | 0.21     | 0.39    |
| $\beta_{SP}$                                | 0.05    | 0.68    | 1.21    | 0.57    | -0.04   | 0.11    | 0.59    | 0.38    | 0.48    | 1.07     | 0.05     | —        | 1.32     | 0.54    |
| $\beta_{ST}$                                | 0.16    | 0.83    | 1.30    | 0.57    | 0.00    | 0.38    | 0.78    | 0.58    | 0.93    | 1.23     | 0.14     | 1.50     | 1.39     | 0.75    |
| $\beta_{remating/P}$                        | 0.36    | 0.67    | 1.39    | 0.62    | 0.05    | 0.28    | 0.58    | 0.44    | 0.76    | 0.70     | 0.05     | —        | 1.43     | 0.61    |

\*Based on the approach by Arnold and Wade (1).

†Univariate selection gradients (1).

1. Arnold S, Wade MJ (1984) On the measurement of natural and sexual selection: Theory. *Evolution* 38:709–719.
